# Supplementary material for: Leucocyte subset-specific type 1 interferon signatures in SLE and other immune-mediated diseases
Source: RMD Open. 2016 May 16;2(1):e000183. doi: 10.1136/rmdopen-2015-000183 (PMC4879345; doi:10.1136/rmdopen-2015-000183)
Supplement: Supplementary table 3 [file rmdopen-2015-000183supp_table3.xls]

## Sheet: supp_table4_ifi_genes.csv
gene	cd4.mship	cd8.mship	cd14.mship	cd16.mship	in_cd4	in_cd8	in_cd14	in_cd16
PARP9	0.896376	0.91801	0.895454	0.868238	Yes	Yes	Yes	Yes
IFIT3	0.905525	0.925629	0.898122	0.836528	Yes	Yes	Yes	Yes
CMPK2	0.916509	0.936338	0.85966	0.833059	Yes	Yes	Yes	Yes
RSAD2	0.91032	0.932991	0.871729	0.828501	Yes	Yes	Yes	Yes
IFIH1	0.880052	0.869213	0.887449	0.897027	Yes	Yes	Yes	Yes
DDX60	0.884939	0.882609	0.887339	0.865004	Yes	Yes	Yes	Yes
OAS3	0.903647	0.92751	0.855418	0.83286	Yes	Yes	Yes	Yes
DTX3L	0.838215	0.889194	0.890831	0.872907	Yes	Yes	Yes	Yes
XAF1	0.88882	0.892614	0.812218	0.858474	Yes	Yes	Yes	Yes
SAMD9L	0.86541	0.827631	0.910499	0.83559	Yes	Yes	Yes	Yes
EPSTI1	0.847019	0.865346	0.883057	0.830169	Yes	Yes	Yes	Yes
STAT2	0.822655	0.832908	0.874916	0.880727	Yes	Yes	Yes	Yes
IRF7	0.820927	0.892003	0.875122	0.819004	Yes	Yes	Yes	Yes
HERC5	0.848324	0.824926	0.888288	0.843638	Yes	Yes	Yes	Yes
OAS2	0.87116	0.891878	0.824435	0.804462	Yes	Yes	Yes	Yes
IFI35	0.840415	0.79259	0.87489	0.88318	Yes	Yes	Yes	Yes
IFIT2	0.854565	0.826849	0.902845	0.792054	Yes	Yes	Yes	Yes
MX1	0.879574	0.877383	0.816669	0.794683	Yes	Yes	Yes	Yes
IFIT1	0.871822	0.877829	0.8419	0.757971	Yes	Yes	Yes	Yes
EIF2AK2	0.889574	0.87766	0.844809	0.731298	Yes	Yes	Yes	Yes
DDX58	0.813108	0.784877	0.875897	0.863971	Yes	Yes	Yes	Yes
IFI6	0.854871	0.840928	0.836396	0.779371	Yes	Yes	Yes	Yes
PARP12	0.822486	0.732141	0.899401	0.854892	Yes	Yes	Yes	Yes
UBE2L6	0.72704	0.786272	0.891329	0.890537	Yes	Yes	Yes	Yes
IFIT5	0.812075	0.754152	0.846123	0.856449	Yes	Yes	Yes	Yes
OAS1	0.824235	0.883673	0.735363	0.808123	Yes	Yes	Yes	Yes
IFI44L	0.822098	0.825606	0.799484	0.800678	Yes	Yes	Yes	Yes
USP41	0.884257	0.900789	0.809011	0.649569	Yes	Yes	Yes	Yes
HELZ2	0.837382	0.78825	0.835575	0.780987	Yes	Yes	Yes	Yes
ISG15	0.785035	0.78997	0.829307	0.82958	Yes	Yes	Yes	Yes
LAP3	0.762706	0.870829	0.823662	0.756161	Yes	Yes	Yes	Yes
IFI44	0.836306	0.794625	0.764957	0.811008	Yes	Yes	Yes	Yes
SPATS2L	0.850777	0.73431	0.811304	0.795879	Yes	Yes	Yes	Yes
STAT1	0.721035	0.767104	0.859371	0.823538	Yes	Yes	Yes	Yes
ADAR	0.783855	0.816129	0.839249	0.720855	Yes	Yes	Yes	Yes
SAMD9	0.746197	0.730097	0.869558	0.81357	Yes	Yes	Yes	Yes
GBP1	0.699426	0.74002	0.882814	0.832135	Yes	Yes	Yes	Yes
ETV7	0.75374	0.653212	0.913103	0.832811	Yes	Yes	Yes	Yes
USP18	0.845971	0.848656	0.802284	0.654088	Yes	Yes	Yes	Yes
CMTR1	0.667249	0.694611	0.847131	0.902808	Yes	Yes	Yes	Yes
DHX58	0.702546	0.659476	0.835678	0.865602	Yes	Yes	Yes	Yes
MX2	0.849927	0.776495	0.771693	0.662437	Yes	Yes	Yes	Yes
RTP4	0.743712	0.679315	0.77652	0.840814	Yes	Yes	Yes	Yes
TRAFD1	0.738323	0.760157	0.642435	0.888365	Yes	Yes	Yes	Yes
ZNFX1	0.686921	0.722278	0.853243	0.735786	Yes	Yes	Yes	Yes
BST2	0.668968	0.727504	0.691036	0.895254	Yes	Yes	Yes	Yes
SP110	0.70759	0.609467	0.864921	0.794657	Yes	Yes	Yes	Yes
PARP14	0.667085	0.628893	0.826286	0.850379	Yes	Yes	Yes	Yes
CHMP5	0.701162	0.721617	0.727868	0.801485	Yes	Yes	Yes	Yes
IFI27	0.842233	0.83383	0.766317	0.438001	Yes	Yes	Yes	Yes
ZCCHC2	0.726224	0.646801	0.672214	0.834891	Yes	Yes	Yes	Yes
GBP4	0.511053	0.681031	0.815378	0.861676	Yes	Yes	Yes	Yes
TAP2	0.551617	0.543397	0.836482	0.86849	Yes	Yes	Yes	Yes
LAMP3	0.852264	0.813248	0.296139	0.836013	Yes	Yes	Yes	Yes
IRF9	0.673618	0.720539	0.638295	0.764323	Yes	Yes	Yes	Yes
PSMB8	0.596516	0.641969	0.767815	0.775788	Yes	Yes	Yes	Yes
TMEM140	0.674926	0.59211	0.73555	0.728689	Yes	Yes	Yes	Yes
LGALS9B	0.714715	0.743661	0.606309	0.561292	Yes	Yes	Yes	Yes
NMI	0.594545	0.67361	0.573485	0.689311	Yes	Yes	Yes	Yes
LGALS9C	0.686395	0.720283	0.591024	0.517379	Yes	Yes	Yes	Yes
SIGLEC1	0.65075	0.566357	0.776374	0.514755	Yes	Yes	Yes	Yes
DDX60L	0.637776	0.621361	0.623057	0.590517	Yes	Yes	Yes	Yes
LGALS9	0.632316	0.709433	0.499232	0.594931	Yes	Yes	Yes	Yes
TRIM25	0.768102	0.823159	0.345907	0.320215	Yes	Yes	Yes	Yes
FBXO39	0.575433	0.501581	0.436322	0.69071	Yes	Yes	Yes	Yes
RUFY4	0.614534	0.426364	0.740908	0.309868	Yes	Yes	Yes	Yes
LINC00487	0.612416	0.526015	0.429846	0.353998	Yes	Yes	Yes	Yes
AASS	NA	NA	0.182124	NA	No	No	Yes	No
ABCA1	NA	NA	0.188701	0.293611	No	No	Yes	Yes
ABCD1	NA	NA	0.361897	0.466507	No	No	Yes	Yes
ABCG1	NA	NA	NA	0.240152	No	No	No	Yes
ABCG2	0.377752	NA	NA	NA	Yes	No	No	No
ABTB2	NA	NA	0.673604	NA	No	No	Yes	No
ACOT9	NA	NA	NA	0.72244	No	No	No	Yes
ACP2	NA	NA	0.638634	NA	No	No	Yes	No
ACSF2	NA	NA	NA	0.409699	No	No	No	Yes
ACSL5	NA	NA	0.526989	0.747735	No	No	Yes	Yes
ACTA2	NA	NA	0.201965	0.646685	No	No	Yes	Yes
ACTA2-AS1	NA	NA	NA	0.195384	No	No	No	Yes
ADAMDEC1	NA	NA	0.244047	NA	No	No	Yes	No
ADAMTSL4	NA	NA	0.42722	NA	No	No	Yes	No
ADCY7	NA	NA	0.400131	0.592584	No	No	Yes	Yes
ADO	NA	NA	0.41504	0.247085	No	No	Yes	Yes
ADPRH	NA	NA	0.537887	0.25905	No	No	Yes	Yes
ADPRHL2	NA	NA	0.688211	NA	No	No	Yes	No
ADPRM	NA	NA	NA	0.570665	No	No	No	Yes
AEN	NA	NA	0.428461	NA	No	No	Yes	No
AFF1	NA	NA	NA	0.649903	No	No	No	Yes
AGBL2	NA	NA	0.152672	0.168729	No	No	Yes	Yes
AGPAT3	NA	NA	0.619663	0.598846	No	No	Yes	Yes
AGRN	NA	NA	0.771002	0.607892	No	No	Yes	Yes
AIDA	NA	NA	NA	0.799442	No	No	No	Yes
AIFM3	NA	NA	0.248521	NA	No	No	Yes	No
AIM2	NA	NA	0.762809	NA	No	No	Yes	No
AKAP13	NA	NA	NA	0.333686	No	No	No	Yes
AKAP7	NA	NA	0.557554	0.262885	No	No	Yes	Yes
AKIRIN2	NA	NA	0.387163	NA	No	No	Yes	No
AKR1A1	NA	NA	NA	0.265218	No	No	No	Yes
ALG11	NA	NA	NA	0.66953	No	No	No	Yes
ALMS1P	NA	NA	NA	0.51238	No	No	No	Yes
ALS2CR11	NA	NA	0.225137	NA	No	No	Yes	No
AMBRA1	NA	NA	NA	0.630244	No	No	No	Yes
ANGPTL6	NA	NA	NA	0.377945	No	No	No	Yes
ANKDD1A	NA	NA	NA	0.334269	No	No	No	Yes
ANKFY1	NA	NA	0.711496	0.872895	No	No	Yes	Yes
ANKRD13A	NA	NA	0.441784	NA	No	No	Yes	No
ANKRD22	NA	NA	0.782546	NA	No	No	Yes	No
ANKRD45	NA	NA	0.31324	NA	No	No	Yes	No
ANO5	NA	NA	0.276149	NA	No	No	Yes	No
ANO6	NA	NA	NA	0.695321	No	No	No	Yes
ANXA2R	NA	NA	NA	0.644686	No	No	No	Yes
AP1M2	NA	NA	NA	0.315696	No	No	No	Yes
AP1S3	NA	NA	NA	0.591858	No	No	No	Yes
AP2B1	NA	NA	0.258505	NA	No	No	Yes	No
AP5B1	NA	NA	0.512796	NA	No	No	Yes	No
APH1A	NA	NA	NA	0.502815	No	No	No	Yes
APOBEC3B	NA	NA	0.690923	0.561086	No	No	Yes	Yes
APOBEC3C	NA	NA	0.477733	0.864818	No	No	Yes	Yes
APOBEC3G	NA	NA	0.763964	0.824376	No	No	Yes	Yes
APOBEC3H	NA	NA	0.358831	NA	No	No	Yes	No
APOC1	NA	NA	0.199109	NA	No	No	Yes	No
APOF	NA	NA	NA	0.19206	No	No	No	Yes
APOL1	0.529663	NA	0.714319	0.851163	Yes	No	Yes	Yes
APOL2	0.44656	NA	0.752866	0.870591	Yes	No	Yes	Yes
APOL3	0.466134	NA	0.744693	0.626503	Yes	No	Yes	Yes
APOL4	NA	NA	0.564782	0.421257	No	No	Yes	Yes
APOL6	0.589528	NA	0.862748	0.869545	Yes	No	Yes	Yes
APPBP2	NA	NA	NA	0.546757	No	No	No	Yes
ARAP2	NA	NA	0.627974	NA	No	No	Yes	No
ARFIP1	NA	NA	NA	0.42029	No	No	No	Yes
ARHGAP17	NA	NA	0.538727	0.703764	No	No	Yes	Yes
ARHGAP31	NA	NA	0.213066	NA	No	No	Yes	No
ARHGAP5	NA	NA	NA	0.352842	No	No	No	Yes
ARHGEF3	NA	NA	0.554894	NA	No	No	Yes	No
ARL2	NA	NA	NA	0.657202	No	No	No	Yes
ARL5B	NA	NA	NA	0.754413	No	No	No	Yes
ARMCX2	NA	NA	0.28017	NA	No	No	Yes	No
ARVP6125	NA	NA	0.169281	NA	No	No	Yes	No
ASAP2	NA	NA	0.393336	NA	No	No	Yes	No
ASB2	NA	NA	0.304668	NA	No	No	Yes	No
ASCL2	NA	NA	0.458345	0.481934	No	No	Yes	Yes
ASPHD2	NA	NA	0.57663	0.678228	No	No	Yes	Yes
ASPRV1	NA	NA	NA	0.515741	No	No	No	Yes
ATF3	NA	NA	NA	0.663829	No	No	No	Yes
ATF5	NA	NA	0.736723	0.237861	No	No	Yes	Yes
ATG3	NA	NA	NA	0.592468	No	No	No	Yes
ATOX1	NA	NA	0.486545	NA	No	No	Yes	No
ATP10A	NA	NA	0.734948	NA	No	No	Yes	No
ATP10D	NA	NA	NA	0.580633	No	No	No	Yes
ATP13A1	NA	NA	0.704676	NA	No	No	Yes	No
ATP1B2	NA	NA	0.386248	NA	No	No	Yes	No
ATP1B3	NA	NA	0.417904	0.42126	No	No	Yes	Yes
ATP6V1G1	NA	NA	NA	0.64999	No	No	No	Yes
ATP6V1G2	NA	NA	NA	0.282113	No	No	No	Yes
ATR	NA	NA	NA	0.609192	No	No	No	Yes
ATXN7	NA	NA	0.365657	0.65737	No	No	Yes	Yes
AURKB	NA	NA	NA	0.293849	No	No	No	Yes
AXL	NA	NA	0.595636	NA	No	No	Yes	No
B2M	NA	NA	0.474759	NA	No	No	Yes	No
BAG1	NA	NA	0.491786	0.550784	No	No	Yes	Yes
BAK1	NA	NA	0.500385	0.64458	No	No	Yes	Yes
BATF2	NA	NA	0.899602	0.835755	No	No	Yes	Yes
BATF3	NA	NA	NA	0.462543	No	No	No	Yes
BAZ2A	NA	NA	0.507995	0.387739	No	No	Yes	Yes
BBS7	NA	NA	NA	0.432611	No	No	No	Yes
BBX	NA	NA	0.436719	0.762586	No	No	Yes	Yes
BCL2L14	0.63315	0.623902	0.372682	NA	Yes	Yes	Yes	No
BCL9L	NA	NA	0.25458	0.304076	No	No	Yes	Yes
BIN3	NA	NA	NA	0.517907	No	No	No	Yes
BIRC2	NA	NA	NA	0.599644	No	No	No	Yes
BIRC3	NA	NA	0.361174	0.699325	No	No	Yes	Yes
BLNK	NA	NA	0.592781	NA	No	No	Yes	No
BLVRA	NA	NA	0.694816	NA	No	No	Yes	No
BMPR2	NA	NA	0.406633	0.696632	No	No	Yes	Yes
BRCA1	NA	NA	NA	0.542666	No	No	No	Yes
BRCA2	NA	NA	0.59654	0.678046	No	No	Yes	Yes
BRD7	NA	NA	NA	0.760116	No	No	No	Yes
BROX	NA	NA	NA	0.443294	No	No	No	Yes
BTLA	NA	NA	NA	0.481272	No	No	No	Yes
BTN2A1	NA	NA	NA	0.562044	No	No	No	Yes
BTN2A2	NA	NA	NA	0.69965	No	No	No	Yes
BTN2A3P	NA	NA	NA	0.595964	No	No	No	Yes
BTN3A1	NA	NA	0.625147	0.790618	No	No	Yes	Yes
BTN3A2	NA	NA	0.371612	0.678478	No	No	Yes	Yes
BTN3A3	NA	NA	0.649972	0.841574	No	No	Yes	Yes
BUD31	NA	NA	NA	0.530397	No	No	No	Yes
C11orf21	NA	NA	NA	0.350576	No	No	No	Yes
C11orf85	NA	NA	NA	0.30879	No	No	No	Yes
C12orf4	NA	NA	NA	0.626666	No	No	No	Yes
C14orf93	NA	NA	NA	0.602512	No	No	No	Yes
C15orf48	NA	NA	0.310562	0.327206	No	No	Yes	Yes
C18orf25	NA	NA	NA	0.672899	No	No	No	Yes
C18orf8	NA	NA	0.548339	NA	No	No	Yes	No
C19orf66	0.67807	NA	0.81061	0.798544	Yes	No	Yes	Yes
C1GALT1	NA	NA	0.678835	0.659194	No	No	Yes	Yes
C1orf200	NA	NA	0.438306	NA	No	No	Yes	No
C2	NA	NA	0.800959	0.266931	No	No	Yes	Yes
C2CD2	NA	NA	NA	0.32261	No	No	No	Yes
C2orf47	NA	NA	0.514852	NA	No	No	Yes	No
C2orf66	NA	NA	0.249799	NA	No	No	Yes	No
C3	NA	NA	NA	0.384117	No	No	No	Yes
C3orf38	NA	NA	NA	0.766386	No	No	No	Yes
C4orf33	NA	NA	0.366125	0.482597	No	No	Yes	Yes
C5	NA	NA	NA	0.729492	No	No	No	Yes
C5orf42	NA	NA	NA	0.207419	No	No	No	Yes
C5orf56	NA	NA	0.670908	0.87694	No	No	Yes	Yes
C6orf106	NA	NA	0.443654	0.707158	No	No	Yes	Yes
C6orf222	NA	NA	NA	0.224914	No	No	No	Yes
C6orf62	NA	NA	NA	0.289061	No	No	No	Yes
C7orf31	NA	NA	NA	0.417334	No	No	No	Yes
C7orf50	NA	NA	NA	0.295345	No	No	No	Yes
C7orf61	NA	NA	NA	0.416906	No	No	No	Yes
C9orf85	NA	NA	NA	0.477556	No	No	No	Yes
CA2	NA	NA	0.37245	NA	No	No	Yes	No
CADM4	NA	NA	NA	0.524146	No	No	No	Yes
CALCOCO2	NA	NA	NA	0.716577	No	No	No	Yes
CAPN2	NA	NA	0.182868	0.406053	No	No	Yes	Yes
CARD17	NA	NA	0.424016	0.712099	No	No	Yes	Yes
CASP1	NA	NA	NA	0.67833	No	No	No	Yes
CASP10	NA	NA	NA	0.622963	No	No	No	Yes
CASP4	NA	NA	0.520233	NA	No	No	Yes	No
CASP5	NA	NA	0.661669	0.479061	No	No	Yes	Yes
CASP7	0.444916	NA	0.638598	0.28759	Yes	No	Yes	Yes
CASZ1	NA	NA	0.312348	0.526642	No	No	Yes	Yes
CBLN3	NA	NA	0.345398	NA	No	No	Yes	No
CBR1	NA	NA	0.710015	0.396771	No	No	Yes	Yes
CCDC122	NA	NA	NA	0.20334	No	No	No	Yes
CCDC146	NA	NA	NA	0.647935	No	No	No	Yes
CCDC167	NA	NA	NA	0.439276	No	No	No	Yes
CCDC176	NA	NA	0.175523	NA	No	No	Yes	No
CCDC97	NA	NA	NA	0.733883	No	No	No	Yes
CCHCR1	NA	NA	NA	0.337512	No	No	No	Yes
CCL1	NA	NA	0.516148	NA	No	No	Yes	No
CCL2	NA	NA	0.672132	0.327691	No	No	Yes	Yes
CCL7	NA	NA	0.27534	NA	No	No	Yes	No
CCL8	NA	NA	0.635702	NA	No	No	Yes	No
CCNA2	NA	NA	NA	0.244432	No	No	No	Yes
CCNE1	NA	NA	0.224082	NA	No	No	Yes	No
CCNK	NA	NA	0.457316	NA	No	No	Yes	No
CCR1	NA	NA	0.327676	0.57959	No	No	Yes	Yes
CCR5	NA	NA	0.335878	NA	No	No	Yes	No
CCRL2	NA	NA	0.313353	0.684068	No	No	Yes	Yes
CD109	NA	NA	0.153582	NA	No	No	Yes	No
CD274	0.449825	NA	0.750865	0.723651	Yes	No	Yes	Yes
CD2AP	NA	NA	0.841455	0.858686	No	No	Yes	Yes
CD300A	NA	NA	0.431067	0.399312	No	No	Yes	Yes
CD38	NA	NA	0.712829	NA	No	No	Yes	No
CD53	NA	NA	NA	0.205906	No	No	No	Yes
CD5L	NA	NA	0.353102	NA	No	No	Yes	No
CD69	NA	NA	NA	0.624375	No	No	No	Yes
CD72	NA	NA	0.390323	NA	No	No	Yes	No
CD74	NA	NA	NA	0.667447	No	No	No	Yes
CD83	NA	NA	NA	0.377397	No	No	No	Yes
CDC42EP2	NA	NA	0.343488	NA	No	No	Yes	No
CDC42EP4	NA	NA	0.276322	NA	No	No	Yes	No
CDC6	NA	NA	NA	0.302351	No	No	No	Yes
CDCP1	NA	NA	NA	0.29162	No	No	No	Yes
CDHR5	NA	NA	0.361317	NA	No	No	Yes	No
CDK17	NA	NA	NA	0.668268	No	No	No	Yes
CDKL1	NA	NA	0.267535	NA	No	No	Yes	No
CEACAM3	NA	NA	NA	0.219826	No	No	No	Yes
CECR1	NA	NA	0.461028	0.389808	No	No	Yes	Yes
CENPJ	NA	NA	0.291816	NA	No	No	Yes	No
CENPN	NA	NA	0.482605	NA	No	No	Yes	No
CEP162	NA	NA	NA	0.715537	No	No	No	Yes
CEP19	NA	NA	NA	0.372105	No	No	No	Yes
CFAP221	NA	NA	0.187213	NA	No	No	Yes	No
CFAP36	NA	NA	NA	0.483552	No	No	No	Yes
CFB	NA	NA	0.659577	NA	No	No	Yes	No
CFH	NA	NA	0.467103	NA	No	No	Yes	No
CHD1	NA	NA	NA	0.648817	No	No	No	Yes
CHRNB3	NA	NA	0.214105	NA	No	No	Yes	No
CHST12	NA	NA	0.418724	NA	No	No	Yes	No
CIB2	NA	NA	0.251391	NA	No	No	Yes	No
CIR1	NA	NA	0.500096	0.707037	No	No	Yes	Yes
CISH	NA	NA	0.284026	0.493507	No	No	Yes	Yes
CITED2	NA	NA	NA	0.278778	No	No	No	Yes
CLCN4	NA	NA	0.251935	NA	No	No	Yes	No
CLCN5	NA	NA	NA	0.437201	No	No	No	Yes
CLCN7	NA	NA	0.454214	NA	No	No	Yes	No
CLEC16A	NA	NA	0.17872	NA	No	No	Yes	No
CLEC1A	NA	NA	NA	0.391712	No	No	No	Yes
CLEC2B	NA	NA	NA	0.504431	No	No	No	Yes
CLEC4A	NA	NA	NA	0.521652	No	No	No	Yes
CLEC6A	NA	NA	0.407084	NA	No	No	Yes	No
CLIC4	NA	NA	NA	0.345474	No	No	No	Yes
CMC2	NA	NA	0.448745	0.808065	No	No	Yes	Yes
CMKLR1	NA	NA	0.392399	NA	No	No	Yes	No
CNDP2	NA	NA	0.6283	0.648917	No	No	Yes	Yes
CNP	0.654134	NA	0.668096	0.741685	Yes	No	Yes	Yes
CNTRL	NA	NA	NA	0.790381	No	No	No	Yes
COA1	NA	NA	0.550284	NA	No	No	Yes	No
COA6	NA	0.589526	NA	0.70134	No	Yes	No	Yes
COMMD4	NA	NA	NA	0.221805	No	No	No	Yes
COQ10B	NA	NA	0.410785	0.45329	No	No	Yes	Yes
COX14	NA	NA	NA	0.387694	No	No	No	Yes
COX18	NA	NA	NA	0.379573	No	No	No	Yes
CPEB2	NA	NA	0.254982	0.329231	No	No	Yes	Yes
CPEB3	NA	NA	0.446904	NA	No	No	Yes	No
CREB3L2	NA	NA	NA	0.808179	No	No	No	Yes
CREBRF	NA	NA	NA	0.316188	No	No	No	Yes
CREG1	NA	NA	NA	0.319899	No	No	No	Yes
CRSP8P	NA	NA	NA	0.226182	No	No	No	Yes
CSF1	NA	NA	0.434337	0.548465	No	No	Yes	Yes
CSF2RB	NA	NA	0.299392	0.179609	No	No	Yes	Yes
CSRNP1	NA	NA	NA	0.45291	No	No	No	Yes
CTBP1-AS2	NA	NA	0.193528	NA	No	No	Yes	No
CTSL	NA	NA	0.676772	NA	No	No	Yes	No
CTSO	NA	NA	NA	0.209731	No	No	No	Yes
CXCL10	NA	0.573952	0.782517	0.510017	No	Yes	Yes	Yes
CXCL11	NA	NA	0.779664	NA	No	No	Yes	No
CXCL9	NA	NA	0.572044	NA	No	No	Yes	No
CXorf21	NA	NA	NA	0.781368	No	No	No	Yes
CYB561	NA	NA	0.576799	0.723918	No	No	Yes	Yes
CYB5B	NA	NA	NA	0.472215	No	No	No	Yes
CYBB	NA	NA	NA	0.614408	No	No	No	Yes
CYLD	NA	NA	0.544212	0.544993	No	No	Yes	Yes
CYP2J2	0.584865	NA	NA	NA	Yes	No	No	No
CYSLTR1	NA	NA	0.418655	0.706377	No	No	Yes	Yes
DAPP1	NA	NA	NA	0.802966	No	No	No	Yes
DAZAP1	NA	NA	0.317554	NA	No	No	Yes	No
DBF4B	NA	NA	NA	0.261294	No	No	No	Yes
DBN1	NA	NA	NA	0.325866	No	No	No	Yes
DCAF11	NA	NA	NA	0.807537	No	No	No	Yes
DCAF5	NA	NA	NA	0.416404	No	No	No	Yes
DCLK2	NA	NA	0.180093	NA	No	No	Yes	No
DCLRE1C	NA	NA	NA	0.649028	No	No	No	Yes
DCUN1D3	NA	NA	NA	0.677372	No	No	No	Yes
DDB2	NA	NA	0.616784	NA	No	No	Yes	No
DDO	NA	NA	0.427322	NA	No	No	Yes	No
DEAF1	NA	NA	NA	0.521897	No	No	No	Yes
DECR1	NA	NA	NA	0.503322	No	No	No	Yes
DEFB1	NA	NA	0.371878	NA	No	No	Yes	No
DEK	NA	NA	NA	0.704912	No	No	No	Yes
DENND1A	NA	NA	NA	0.695761	No	No	No	Yes
DENND1B	NA	NA	0.535032	NA	No	No	Yes	No
DENND2C	NA	NA	0.231524	NA	No	No	Yes	No
DENND5A	NA	NA	0.46652	NA	No	No	Yes	No
DHDH	NA	NA	NA	0.338941	No	No	No	Yes
DHRS9	NA	NA	0.419372	0.716199	No	No	Yes	Yes
DLL1	NA	NA	0.54543	NA	No	No	Yes	No
DNAJA1	NA	NA	0.605459	0.598475	No	No	Yes	Yes
DNAJA4	NA	NA	0.312272	NA	No	No	Yes	No
DNAJB4	NA	NA	0.331814	0.339123	No	No	Yes	Yes
DNAJC1	NA	NA	NA	0.760542	No	No	No	Yes
DNAJC15	NA	NA	NA	0.775346	No	No	No	Yes
DNMT1	NA	NA	0.659742	NA	No	No	Yes	No
DNPEP	NA	NA	NA	0.346803	No	No	No	Yes
DOCK10	NA	NA	0.386391	0.262332	No	No	Yes	Yes
DOCK4	NA	NA	NA	0.593405	No	No	No	Yes
DPY19L2	NA	NA	0.144563	NA	No	No	Yes	No
DRAM2	NA	NA	NA	0.552259	No	No	No	Yes
DRAP1	NA	NA	0.577665	0.749941	No	No	Yes	Yes
DTNB	NA	NA	0.132007	NA	No	No	Yes	No
DTX2P1-UPK3BP1-PMS2P11	NA	NA	NA	0.229089	No	No	No	Yes
DUSP5	NA	NA	0.621502	0.702454	No	No	Yes	Yes
DYNLT1	NA	NA	0.628319	NA	No	No	Yes	No
EBI3	NA	NA	0.283373	NA	No	No	Yes	No
ECEL1P2	NA	NA	NA	0.253087	No	No	No	Yes
ECM1	NA	NA	0.233723	NA	No	No	Yes	No
EDA2R	NA	NA	0.180322	NA	No	No	Yes	No
EDN1	NA	NA	NA	0.19414	No	No	No	Yes
EHD4	NA	NA	0.216308	NA	No	No	Yes	No
ELF1	NA	NA	NA	0.632645	No	No	No	Yes
ELF4	NA	NA	0.653546	0.633564	No	No	Yes	Yes
ELMOD3	NA	NA	NA	0.506854	No	No	No	Yes
EMC9	NA	NA	NA	0.507307	No	No	No	Yes
EML4	NA	NA	0.481684	NA	No	No	Yes	No
EMP1	NA	NA	0.345023	NA	No	No	Yes	No
ENDOD1	NA	NA	0.476937	NA	No	No	Yes	No
ENPP2	NA	NA	0.50633	NA	No	No	Yes	No
ENPP4	NA	NA	0.316807	NA	No	No	Yes	No
ENTPD5	NA	NA	0.427446	NA	No	No	Yes	No
ENTPD6	NA	NA	0.290147	NA	No	No	Yes	No
EPB41L3	NA	NA	0.592302	NA	No	No	Yes	No
EPHB2	NA	NA	0.445935	NA	No	No	Yes	No
EPT1	NA	NA	0.512018	0.609537	No	No	Yes	Yes
ERAP1	NA	NA	NA	0.613289	No	No	No	Yes
ERP29	NA	NA	NA	0.66346	No	No	No	Yes
ERP44	NA	NA	NA	0.783363	No	No	No	Yes
ERRFI1	NA	NA	0.374883	NA	No	No	Yes	No
ETV6	NA	NA	0.341266	0.554731	No	No	Yes	Yes
EVI2A	NA	NA	NA	0.312773	No	No	No	Yes
EVL	NA	NA	0.50513	0.629992	No	No	Yes	Yes
EXOC1	NA	NA	NA	0.473845	No	No	No	Yes
EXOC3L1	NA	NA	NA	0.362853	No	No	No	Yes
EXOSC10	NA	NA	0.232527	NA	No	No	Yes	No
EXOSC9	NA	NA	NA	0.576585	No	No	No	Yes
EXPH5	NA	NA	0.432133	NA	No	No	Yes	No
EXT1	NA	NA	0.330029	NA	No	No	Yes	No
EYS	NA	NA	NA	0.233064	No	No	No	Yes
EZR	NA	NA	0.262639	NA	No	No	Yes	No
FAM104A	NA	NA	NA	0.484828	No	No	No	Yes
FAM111A	NA	NA	NA	0.807984	No	No	No	Yes
FAM120AOS	NA	NA	NA	0.409311	No	No	No	Yes
FAM134B	NA	NA	0.212241	NA	No	No	Yes	No
FAM192A	NA	NA	NA	0.626542	No	No	No	Yes
FAM208B	NA	NA	NA	0.770813	No	No	No	Yes
FAM209B	NA	NA	NA	0.329346	No	No	No	Yes
FAM21A	NA	NA	0.328349	0.473759	No	No	Yes	Yes
FAM21C	NA	NA	0.338473	0.466484	No	No	Yes	Yes
FAM26E	NA	NA	0.364869	NA	No	No	Yes	No
FAM26F	NA	NA	0.691509	0.545483	No	No	Yes	Yes
FAM46A	NA	NA	0.546365	0.812159	No	No	Yes	Yes
FAM46C	NA	NA	NA	0.684593	No	No	No	Yes
FAM69A	NA	NA	0.321483	NA	No	No	Yes	No
FAM8A1	NA	NA	0.744145	0.754763	No	No	Yes	Yes
FAM92A1	NA	NA	0.373388	NA	No	No	Yes	No
FAM98A	NA	NA	NA	0.28354	No	No	No	Yes
FANCL	NA	NA	0.652985	NA	No	No	Yes	No
FAP	NA	NA	NA	0.363362	No	No	No	Yes
FAS	NA	NA	0.603172	0.645085	No	No	Yes	Yes
FBXO44	NA	NA	0.264073	0.326438	No	No	Yes	Yes
FBXO6	NA	NA	0.866977	0.817447	No	No	Yes	Yes
FCGR2B	NA	NA	NA	0.316577	No	No	No	Yes
FCGR3A	NA	NA	NA	0.322061	No	No	No	Yes
FCRL3	0.374626	NA	NA	NA	Yes	No	No	No
FCRLB	NA	NA	NA	0.275938	No	No	No	Yes
FDXR	NA	NA	0.234068	NA	No	No	Yes	No
FFAR2	NA	NA	0.618598	0.638495	No	No	Yes	Yes
FFAR4	NA	NA	0.257132	NA	No	No	Yes	No
FIBP	NA	NA	NA	0.520093	No	No	No	Yes
FIG4	NA	NA	NA	0.492731	No	No	No	Yes
FIGLA	NA	NA	0.178409	NA	No	No	Yes	No
FKBP9P1	NA	NA	0.259694	NA	No	No	Yes	No
FLT3LG	NA	NA	0.536385	0.596506	No	No	Yes	Yes
FMR1	NA	NA	NA	0.763603	No	No	No	Yes
FNIP2	NA	NA	0.460458	NA	No	No	Yes	No
FNTB	NA	NA	NA	0.430486	No	No	No	Yes
FOXN3	NA	NA	0.428738	NA	No	No	Yes	No
FPR3	NA	NA	0.330925	NA	No	No	Yes	No
FRMD3	NA	NA	0.637699	0.852922	No	No	Yes	Yes
FUNDC1	NA	NA	NA	0.536374	No	No	No	Yes
FUT9	NA	NA	0.19542	NA	No	No	Yes	No
FYCO1	NA	NA	NA	0.322402	No	No	No	Yes
FYTTD1	NA	NA	NA	0.710919	No	No	No	Yes
FZD5	NA	NA	NA	0.331641	No	No	No	Yes
GADD45B	NA	NA	NA	0.621428	No	No	No	Yes
GALC	NA	NA	NA	0.545719	No	No	No	Yes
GALM	NA	NA	NA	0.707822	No	No	No	Yes
GAPT	NA	NA	NA	0.370803	No	No	No	Yes
GAREM	NA	NA	0.289366	NA	No	No	Yes	No
GAS8	NA	NA	NA	0.693162	No	No	No	Yes
GBP2	NA	NA	0.697285	0.737184	No	No	Yes	Yes
GBP3	NA	NA	0.505531	0.842997	No	No	Yes	Yes
GBP5	0.331798	NA	0.842103	0.812276	Yes	No	Yes	Yes
GBP6	0.405573	NA	0.531223	0.835941	Yes	No	Yes	Yes
GBP7	NA	0.47823	0.693146	0.69451	No	Yes	Yes	Yes
GCC1	NA	NA	NA	0.682951	No	No	No	Yes
GCH1	NA	NA	0.795442	NA	No	No	Yes	No
GDAP1	NA	NA	0.438107	NA	No	No	Yes	No
GDPD5	NA	NA	0.510498	NA	No	No	Yes	No
GIMAP1	NA	NA	NA	0.367053	No	No	No	Yes
GIMAP2	NA	NA	NA	0.787848	No	No	No	Yes
GIMAP4	NA	NA	0.433049	0.633394	No	No	Yes	Yes
GIMAP6	NA	NA	0.36321	0.624656	No	No	Yes	Yes
GIMAP8	NA	NA	NA	0.507289	No	No	No	Yes
GIP	NA	NA	0.17951	NA	No	No	Yes	No
GK	NA	NA	NA	0.328198	No	No	No	Yes
GLTSCR1	NA	NA	NA	0.391939	No	No	No	Yes
GMNN	NA	NA	NA	0.437533	No	No	No	Yes
GMPR	NA	NA	0.792172	NA	No	No	Yes	No
GNA11	NA	NA	0.362081	NA	No	No	Yes	No
GNA15	NA	NA	NA	0.454128	No	No	No	Yes
GNB4	NA	NA	NA	0.676222	No	No	No	Yes
GNGT2	NA	NA	0.518157	NA	No	No	Yes	No
GOLM1	NA	NA	0.166128	NA	No	No	Yes	No
GOLPH3L	NA	NA	NA	0.345987	No	No	No	Yes
GORASP1	NA	NA	0.404273	0.643	No	No	Yes	Yes
GPBAR1	NA	NA	0.503269	NA	No	No	Yes	No
GPBP1	NA	NA	NA	0.606389	No	No	No	Yes
GPD2	NA	NA	0.511423	0.658726	No	No	Yes	Yes
GPR171	NA	NA	NA	0.408252	No	No	No	Yes
GPR18	NA	NA	0.633974	NA	No	No	Yes	No
GPR180	NA	NA	0.295397	NA	No	No	Yes	No
GPR65	NA	NA	NA	0.572654	No	No	No	Yes
GPR68	NA	NA	NA	0.271669	No	No	No	Yes
GPT2	NA	NA	0.437387	NA	No	No	Yes	No
GRIN3A	NA	NA	0.641027	0.427635	No	No	Yes	Yes
GRIPAP1	NA	NA	NA	0.587263	No	No	No	Yes
GSDMC	NA	NA	NA	0.370555	No	No	No	Yes
GSDMD	NA	NA	0.627584	0.556872	No	No	Yes	Yes
GSTO2	NA	NA	NA	0.35675	No	No	No	Yes
GTF2B	NA	NA	NA	0.507614	No	No	No	Yes
GTF2F1	NA	NA	NA	0.649223	No	No	No	Yes
GTPBP1	0.675111	NA	0.858532	NA	Yes	No	Yes	No
GTPBP10	NA	NA	NA	0.299823	No	No	No	Yes
GTPBP2	NA	NA	0.572761	0.705061	No	No	Yes	Yes
GVINP1	NA	NA	0.437627	0.748325	No	No	Yes	Yes
HCAR1	NA	NA	0.250332	NA	No	No	Yes	No
HCAR2	NA	NA	NA	0.47539	No	No	No	Yes
HCAR3	NA	NA	NA	0.473673	No	No	No	Yes
HCP5	NA	NA	NA	0.633252	No	No	No	Yes
HEATR5B	NA	NA	NA	0.491036	No	No	No	Yes
HEBP1	NA	NA	NA	0.710117	No	No	No	Yes
HEG1	NA	NA	0.751352	NA	No	No	Yes	No
HEMK1	NA	NA	NA	0.201541	No	No	No	Yes
HERPUD2	NA	NA	0.455449	0.400127	No	No	Yes	Yes
HES4	NA	NA	NA	0.541509	No	No	No	Yes
HESX1	NA	NA	0.693294	NA	No	No	Yes	No
HEXDC	NA	NA	0.406567	0.647931	No	No	Yes	Yes
HHEX	NA	NA	0.33812	NA	No	No	Yes	No
HIF1A	NA	NA	NA	0.474168	No	No	No	Yes
HINT1	NA	NA	NA	0.525515	No	No	No	Yes
HINT3	NA	NA	NA	0.674852	No	No	No	Yes
HIRA	NA	NA	0.588427	NA	No	No	Yes	No
HIVEP1	NA	NA	0.341982	NA	No	No	Yes	No
HIVEP2	NA	NA	0.54999	0.475129	No	No	Yes	Yes
HLA-A	NA	NA	0.406025	0.419083	No	No	Yes	Yes
HLA-B	NA	NA	0.0954255	NA	No	No	Yes	No
HLA-C	NA	NA	0.287348	NA	No	No	Yes	No
HLA-DMA	NA	NA	NA	0.537434	No	No	No	Yes
HLA-DMB	NA	NA	NA	0.514698	No	No	No	Yes
HLA-DOB	NA	NA	NA	0.412239	No	No	No	Yes
HLA-DRA	NA	NA	NA	0.515027	No	No	No	Yes
HLA-DRB5	NA	NA	NA	0.283262	No	No	No	Yes
HLA-E	NA	NA	0.413563	0.525952	No	No	Yes	Yes
HLA-F	NA	NA	0.454566	0.5772	No	No	Yes	Yes
HLA-G	NA	NA	0.210721	NA	No	No	Yes	No
HLA-J	NA	NA	0.23242	NA	No	No	Yes	No
HLA-L	NA	NA	0.273008	0.299037	No	No	Yes	Yes
HMGN4	NA	NA	NA	0.545364	No	No	No	Yes
HMHB1	NA	NA	0.252503	NA	No	No	Yes	No
HNRNPLL	NA	NA	NA	0.633217	No	No	No	Yes
HOMER1	NA	NA	0.224731	NA	No	No	Yes	No
HORMAD1	NA	NA	NA	0.34211	No	No	No	Yes
HOXA1	NA	NA	0.573758	NA	No	No	Yes	No
HOXA4	NA	NA	0.203062	NA	No	No	Yes	No
HOXB2	NA	NA	0.1873	NA	No	No	Yes	No
HOXB3	NA	NA	0.256209	NA	No	No	Yes	No
HOXB4	NA	NA	0.380735	NA	No	No	Yes	No
HPS3	NA	NA	NA	0.503984	No	No	No	Yes
HPSE	NA	NA	0.420254	NA	No	No	Yes	No
HSH2D	0.810107	NA	0.738752	NA	Yes	No	Yes	No
HSP90AA4P	NA	NA	NA	0.179607	No	No	No	Yes
HSPA6	NA	NA	0.350719	0.406319	No	No	Yes	Yes
HSPB1	NA	NA	0.509316	NA	No	No	Yes	No
HTRA2	NA	NA	NA	0.23184	No	No	No	Yes
HUS1B	NA	NA	0.160578	NA	No	No	Yes	No
ICAM1	NA	NA	NA	0.512873	No	No	No	Yes
ICAM2	NA	NA	0.640979	0.331112	No	No	Yes	Yes
ICAM4	NA	NA	NA	0.307881	No	No	No	Yes
IDH2	NA	NA	NA	0.575091	No	No	No	Yes
IDO1	NA	NA	0.77431	0.757961	No	No	Yes	Yes
IDO2	NA	NA	0.383543	NA	No	No	Yes	No
IER5	NA	NA	NA	0.378014	No	No	No	Yes
IFI16	0.683018	NA	0.548496	0.62765	Yes	No	Yes	Yes
IFI27L2	NA	NA	NA	0.267411	No	No	No	Yes
IFIT1B	NA	NA	NA	0.458549	No	No	No	Yes
IFITM1	0.516257	NA	0.856565	0.523676	Yes	No	Yes	Yes
IFITM2	NA	NA	0.46424	NA	No	No	Yes	No
IFITM3	NA	0.620277	0.694571	0.642248	No	Yes	Yes	Yes
IFT57	NA	NA	NA	0.451883	No	No	No	Yes
IFT80	NA	NA	NA	0.457972	No	No	No	Yes
IGF2BP3	NA	NA	0.700726	0.701916	No	No	Yes	Yes
IGSF8	NA	NA	0.259156	NA	No	No	Yes	No
IK	NA	NA	0.29181	NA	No	No	Yes	No
IKBKE	0.371614	NA	NA	NA	Yes	No	No	No
IKZF1	NA	NA	0.304803	NA	No	No	Yes	No
IKZF4	0.483315	NA	NA	0.473119	Yes	No	No	Yes
IL10RA	NA	NA	NA	0.312634	No	No	No	Yes
IL12A	NA	NA	0.394347	NA	No	No	Yes	No
IL12RB1	NA	NA	0.761093	0.728512	No	No	Yes	Yes
IL15	NA	NA	0.514723	0.275123	No	No	Yes	Yes
IL1B	NA	NA	NA	0.319236	No	No	No	Yes
IL1RN	NA	NA	NA	0.587708	No	No	No	Yes
IL27	NA	NA	0.486758	NA	No	No	Yes	No
IL2RG	NA	NA	0.494587	0.422333	No	No	Yes	Yes
IL3RA	NA	NA	0.368065	NA	No	No	Yes	No
IL7	NA	NA	0.488073	NA	No	No	Yes	No
ILDR1	NA	NA	0.193926	NA	No	No	Yes	No
INO80C	NA	NA	0.252521	NA	No	No	Yes	No
INSL3	NA	NA	0.257097	NA	No	No	Yes	No
IPO4	0.584417	0.61591	NA	0.61969	Yes	Yes	No	Yes
IPPK	NA	NA	NA	0.502648	No	No	No	Yes
IRAK2	NA	NA	0.328019	NA	No	No	Yes	No
IRF1	0.362469	NA	0.616555	0.683165	Yes	No	Yes	Yes
IRF2	NA	NA	0.663074	0.681297	No	No	Yes	Yes
IRF5	NA	NA	NA	0.77527	No	No	No	Yes
IRF6	NA	NA	0.219391	NA	No	No	Yes	No
IRF8	NA	NA	0.277858	NA	No	No	Yes	No
IRG1	NA	NA	0.56809	NA	No	No	Yes	No
IRS1	0.450773	NA	NA	NA	Yes	No	No	No
ISG20	NA	NA	0.655099	0.700361	No	No	Yes	Yes
ISYNA1	NA	NA	NA	0.164036	No	No	No	Yes
ITGA4	NA	NA	0.316558	NA	No	No	Yes	No
ITGAD	NA	NA	NA	0.137088	No	No	No	Yes
ITGB7	NA	NA	0.64357	NA	No	No	Yes	No
ITPRIP	NA	NA	NA	0.540865	No	No	No	Yes
ITPRIPL2	NA	NA	0.390293	NA	No	No	Yes	No
JADE2	NA	NA	0.373703	0.495159	No	No	Yes	Yes
JAK2	NA	NA	0.72256	NA	No	No	Yes	No
JMJD1C-AS1	NA	NA	NA	0.419458	No	No	No	Yes
JPX	NA	NA	NA	0.679606	No	No	No	Yes
JUP	NA	NA	0.443917	0.269762	No	No	Yes	Yes
KARS	NA	NA	NA	0.758775	No	No	No	Yes
KAT2A	NA	NA	NA	0.287975	No	No	No	Yes
KAT2B	NA	NA	0.531437	NA	No	No	Yes	No
KCND1	NA	NA	NA	0.474155	No	No	No	Yes
KCNIP1	NA	NA	0.181701	NA	No	No	Yes	No
KCNJ10	NA	NA	0.52553	NA	No	No	Yes	No
KCNJ2	NA	NA	NA	0.501435	No	No	No	Yes
KCNMA1	NA	NA	0.289948	NA	No	No	Yes	No
KDELC1	NA	NA	0.185446	NA	No	No	Yes	No
KDM1B	NA	NA	0.545533	NA	No	No	Yes	No
KDM4D	NA	NA	0.127982	NA	No	No	Yes	No
KDM6A	NA	NA	NA	0.39538	No	No	No	Yes
KDSR	NA	NA	NA	0.267247	No	No	No	Yes
KIAA0040	NA	NA	0.427426	NA	No	No	Yes	No
KIAA0319L	NA	NA	NA	0.458989	No	No	No	Yes
KIAA0895L	NA	NA	NA	0.491522	No	No	No	Yes
KIAA0922	NA	NA	0.468563	NA	No	No	Yes	No
KIAA1109	NA	NA	NA	0.561273	No	No	No	Yes
KIAA1467	NA	NA	0.657338	NA	No	No	Yes	No
KIAA1958	NA	NA	0.629429	0.674529	No	No	Yes	Yes
KIF1C	NA	NA	NA	0.322326	No	No	No	Yes
KIR2DL4	NA	NA	0.534775	NA	No	No	Yes	No
KLHDC7B	0.487218	NA	0.772598	0.55313	Yes	No	Yes	Yes
KLHDC8B	NA	NA	NA	0.415768	No	No	No	Yes
KLHL6	NA	NA	0.397551	NA	No	No	Yes	No
KMO	NA	NA	0.716225	NA	No	No	Yes	No
KMT2E	NA	NA	NA	0.252909	No	No	No	Yes
KPNB1	NA	NA	NA	0.717265	No	No	No	Yes
KPTN	NA	NA	NA	0.818722	No	No	No	Yes
KRTAP12-1	NA	NA	0.192431	NA	No	No	Yes	No
L1TD1	NA	NA	0.266191	NA	No	No	Yes	No
L3MBTL4	NA	NA	0.357465	NA	No	No	Yes	No
LACC1	NA	NA	NA	0.239084	No	No	No	Yes
LARP1	NA	NA	0.511161	NA	No	No	Yes	No
LBH	NA	NA	NA	0.341232	No	No	No	Yes
LCP2	NA	NA	0.66672	0.527632	No	No	Yes	Yes
LEPROTL1	NA	NA	0.570464	NA	No	No	Yes	No
LGALS3BP	0.748168	NA	0.882681	0.792458	Yes	No	Yes	Yes
LGMN	NA	NA	0.467759	NA	No	No	Yes	No
LHFPL2	NA	NA	NA	0.855091	No	No	No	Yes
LIF	0.479618	NA	NA	0.358125	Yes	No	No	Yes
LIG3	NA	NA	0.411594	NA	No	No	Yes	No
LIMK1	NA	NA	0.303949	NA	No	No	Yes	No
LINC00161	NA	NA	0.22155	NA	No	No	Yes	No
LINC00189	NA	NA	NA	0.351991	No	No	No	Yes
LINC00339	NA	NA	NA	0.276027	No	No	No	Yes
LINC00467	NA	NA	NA	0.316531	No	No	No	Yes
LINC00982	NA	NA	0.155768	NA	No	No	Yes	No
LINC01011	NA	NA	NA	0.263711	No	No	No	Yes
LINC01138	NA	NA	NA	0.252353	No	No	No	Yes
LINC01260	0.516613	NA	NA	NA	Yes	No	No	No
LMTK2	NA	NA	0.233714	NA	No	No	Yes	No
LOC100127951	NA	NA	0.14122	NA	No	No	Yes	No
LOC100288208	NA	NA	0.154833	NA	No	No	Yes	No
LOC100294362	NA	NA	0.167856	0.323719	No	No	Yes	Yes
LOC100507191	NA	NA	NA	0.313103	No	No	No	Yes
LOC100996455	NA	NA	NA	0.260502	No	No	No	Yes
LOC101927181	NA	NA	0.274747	NA	No	No	Yes	No
LOC153684	NA	NA	NA	0.496659	No	No	No	Yes
LOC339803	NA	NA	NA	0.291031	No	No	No	Yes
LOC554206	NA	NA	NA	0.298616	No	No	No	Yes
LOC554223	NA	NA	0.163489	0.161611	No	No	Yes	Yes
LOC648987	NA	NA	NA	0.670864	No	No	No	Yes
LPAR6	NA	NA	NA	0.531541	No	No	No	Yes
LPIN2	NA	NA	0.305427	NA	No	No	Yes	No
LRRCC1	NA	NA	0.70008	NA	No	No	Yes	No
LRRK2	NA	NA	NA	0.295336	No	No	No	Yes
LUZP1	NA	NA	NA	0.388706	No	No	No	Yes
LY6E	0.724488	NA	0.813464	0.727319	Yes	No	Yes	Yes
LY6G6C	NA	NA	NA	0.182282	No	No	No	Yes
LYN	NA	NA	0.259531	NA	No	No	Yes	No
LYPD5	NA	NA	0.340782	NA	No	No	Yes	No
LYSMD1	NA	NA	NA	0.333476	No	No	No	Yes
LYSMD2	NA	NA	0.63528	0.703154	No	No	Yes	Yes
LYSMD3	NA	NA	NA	0.436384	No	No	No	Yes
MAD2L1BP	NA	NA	NA	0.730911	No	No	No	Yes
MAFF	NA	NA	NA	0.402369	No	No	No	Yes
MAGOH	NA	NA	0.365252	NA	No	No	Yes	No
MAML2	NA	NA	NA	0.461389	No	No	No	Yes
MAP3K11	NA	NA	NA	0.371524	No	No	No	Yes
MAP4K2	NA	NA	0.247506	NA	No	No	Yes	No
MAPK1IP1L	NA	NA	0.2833	NA	No	No	Yes	No
MARCKS	NA	NA	0.575211	NA	No	No	Yes	No
MASTL	NA	NA	0.55722	0.702846	No	No	Yes	Yes
MAT2B	NA	NA	NA	0.612928	No	No	No	Yes
MAX	NA	NA	0.295829	NA	No	No	Yes	No
MBD5	NA	NA	NA	0.50904	No	No	No	Yes
MCOLN2	NA	NA	0.334814	NA	No	No	Yes	No
MDGA1	NA	NA	0.232043	0.191702	No	No	Yes	Yes
MDK	NA	NA	NA	0.629183	No	No	No	Yes
MED12L	NA	NA	0.217989	NA	No	No	Yes	No
MED27	NA	NA	NA	0.23158	No	No	No	Yes
MED28	NA	NA	NA	0.711343	No	No	No	Yes
MEFV	NA	NA	0.326291	NA	No	No	Yes	No
METTL14	NA	NA	NA	0.694532	No	No	No	Yes
METTL4	NA	NA	NA	0.573166	No	No	No	Yes
MFAP1	NA	NA	NA	0.685676	No	No	No	Yes
MFN2	NA	NA	0.14601	NA	No	No	Yes	No
MFSD12	NA	NA	0.387212	0.600284	No	No	Yes	Yes
MFSD7	NA	NA	NA	0.473499	No	No	No	Yes
MGAT1	NA	NA	0.197236	0.244901	No	No	Yes	Yes
MIA3	NA	NA	NA	0.935347	No	No	No	Yes
MICA	NA	NA	NA	0.624995	No	No	No	Yes
MICALL1	NA	NA	NA	0.631881	No	No	No	Yes
MICB	NA	NA	0.483358	0.667485	No	No	Yes	Yes
MIR141	NA	NA	NA	0.258092	No	No	No	Yes
MIR200C	NA	NA	NA	0.347648	No	No	No	Yes
MIR215	NA	NA	0.159245	NA	No	No	Yes	No
MIR222	NA	NA	NA	0.20013	No	No	No	Yes
MIR29A	NA	NA	0.214937	NA	No	No	Yes	No
MIR331	NA	NA	0.362095	0.312215	No	No	Yes	Yes
MITD1	NA	NA	NA	0.684404	No	No	No	Yes
MKLN1	NA	NA	NA	0.470338	No	No	No	Yes
MLLT6	NA	NA	NA	0.636129	No	No	No	Yes
MOB3B	NA	NA	NA	0.229933	No	No	No	Yes
MOB3C	NA	NA	0.377109	0.492563	No	No	Yes	Yes
MORC3	NA	NA	NA	0.427096	No	No	No	Yes
MOV10	0.62921	NA	0.878113	0.917044	Yes	No	Yes	Yes
MR1	NA	NA	0.591657	0.761151	No	No	Yes	Yes
MRPL16	NA	NA	NA	0.528838	No	No	No	Yes
MRPL17	NA	NA	NA	0.344691	No	No	No	Yes
MRPL18	NA	NA	NA	0.412046	No	No	No	Yes
MRPL27	NA	NA	0.262169	NA	No	No	Yes	No
MRPL44	NA	NA	NA	0.810153	No	No	No	Yes
MRPS18A	NA	NA	NA	0.702728	No	No	No	Yes
MSH4	NA	NA	0.264108	NA	No	No	Yes	No
MSR1	NA	NA	0.443836	NA	No	No	Yes	No
MSRB3	NA	NA	0.269315	NA	No	No	Yes	No
MT1A	NA	NA	0.320813	0.308114	No	No	Yes	Yes
MT1B	NA	NA	0.439891	0.441405	No	No	Yes	Yes
MT1F	NA	NA	0.187332	0.649197	No	No	Yes	Yes
MT1G	NA	NA	0.533723	0.674864	No	No	Yes	Yes
MT1H	NA	NA	0.438736	0.523797	No	No	Yes	Yes
MT1HL1	NA	NA	0.371054	0.465563	No	No	Yes	Yes
MT1IP	NA	NA	NA	0.495744	No	No	No	Yes
MT1JP	NA	NA	0.438167	0.414134	No	No	Yes	Yes
MT1M	NA	NA	0.547881	0.377289	No	No	Yes	Yes
MT1X	NA	NA	0.425477	0.696846	No	No	Yes	Yes
MT2A	NA	NA	0.706722	0.842816	No	No	Yes	Yes
MT4	NA	NA	0.295803	0.402411	No	No	Yes	Yes
MTFR2	NA	NA	0.36239	NA	No	No	Yes	No
MTIF2	NA	NA	NA	0.463371	No	No	No	Yes
MTRF1L	NA	NA	NA	0.320536	No	No	No	Yes
MUC1	NA	NA	0.481064	NA	No	No	Yes	No
MVB12B	NA	NA	0.411709	NA	No	No	Yes	No
MVP	NA	NA	0.555793	NA	No	No	Yes	No
MYCBP2	NA	NA	NA	0.605062	No	No	No	Yes
MYD88	NA	NA	0.451548	NA	No	No	Yes	No
MYLIP	NA	NA	NA	0.382924	No	No	No	Yes
MYO7B	NA	NA	0.549056	NA	No	No	Yes	No
MYOF	NA	NA	0.610912	NA	No	No	Yes	No
N4BP1	0.599699	NA	0.516333	NA	Yes	No	Yes	No
N4BP2L1	NA	NA	NA	0.525834	No	No	No	Yes
N4BP2L2	NA	NA	NA	0.242891	No	No	No	Yes
NAA25	NA	NA	NA	0.449149	No	No	No	Yes
NAB1	NA	NA	NA	0.531947	No	No	No	Yes
NADK	NA	NA	0.409524	0.516721	No	No	Yes	Yes
NAGK	NA	NA	0.235299	0.370361	No	No	Yes	Yes
NAPA	0.638796	NA	0.82636	0.894844	Yes	No	Yes	Yes
NASP	NA	NA	NA	0.548603	No	No	No	Yes
NAT1	NA	NA	NA	0.514715	No	No	No	Yes
NAT8B	NA	NA	0.609641	NA	No	No	Yes	No
NBN	NA	NA	NA	0.708714	No	No	No	Yes
NCDN	NA	NA	NA	0.302596	No	No	No	Yes
NCOA2	NA	NA	NA	0.292639	No	No	No	Yes
NDC80	NA	NA	NA	0.730109	No	No	No	Yes
NDUFA5	NA	NA	NA	0.33872	No	No	No	Yes
NDUFA9	NA	NA	NA	0.426455	No	No	No	Yes
NDUFB6	NA	NA	NA	0.419315	No	No	No	Yes
NECAP1	NA	NA	NA	0.322945	No	No	No	Yes
NECAP2	NA	NA	0.224976	NA	No	No	Yes	No
NEXN	0.631359	0.589495	0.799363	NA	Yes	Yes	Yes	No
NFE2L3	0.455743	NA	0.364105	NA	Yes	No	Yes	No
NFIX	NA	NA	0.554591	NA	No	No	Yes	No
NFKB2	NA	NA	NA	0.355927	No	No	No	Yes
NFKBIA	NA	NA	NA	0.210591	No	No	No	Yes
NFKBIE	NA	NA	NA	0.707745	No	No	No	Yes
NFYA	NA	NA	NA	0.488758	No	No	No	Yes
NHSL1	NA	NA	0.396122	NA	No	No	Yes	No
NICN1	NA	NA	NA	0.230837	No	No	No	Yes
NIPAL3	NA	NA	NA	0.349815	No	No	No	Yes
NKAIN1	NA	0.362669	NA	NA	No	Yes	No	No
NKIRAS1	NA	NA	NA	0.564747	No	No	No	Yes
NLK	NA	NA	0.569006	NA	No	No	Yes	No
NLRC5	NA	NA	0.539466	0.676511	No	No	Yes	Yes
NME7	NA	NA	NA	0.397115	No	No	No	Yes
NOD1	NA	NA	0.560278	0.872353	No	No	Yes	Yes
NOD2	NA	NA	0.140485	0.329848	No	No	Yes	Yes
NOM1	NA	NA	NA	0.245246	No	No	No	Yes
NOP2	NA	NA	NA	0.282666	No	No	No	Yes
NPC2	NA	NA	NA	0.643942	No	No	No	Yes
NPHP1	NA	NA	0.23828	NA	No	No	Yes	No
NR1H3	NA	NA	0.409095	NA	No	No	Yes	No
NRIP1	NA	NA	0.615318	NA	No	No	Yes	No
NRL	NA	NA	0.274999	0.201682	No	No	Yes	Yes
NT5C3A	NA	NA	0.613998	NA	No	No	Yes	No
NUB1	NA	NA	0.713435	0.931435	No	No	Yes	Yes
NUP205	NA	NA	NA	0.692648	No	No	No	Yes
NUP62	NA	NA	0.695871	NA	No	No	Yes	No
OASL	0.821952	NA	0.846027	0.815164	Yes	No	Yes	Yes
OBFC1	NA	NA	NA	0.414092	No	No	No	Yes
ODF3B	NA	0.702936	0.72971	0.691872	No	Yes	Yes	Yes
OGFR	NA	NA	NA	0.636871	No	No	No	Yes
OPTN	NA	NA	0.526367	0.295978	No	No	Yes	Yes
OR52K1	NA	NA	NA	0.435985	No	No	No	Yes
OR52K2	NA	NA	NA	0.521617	No	No	No	Yes
OR52K3P	NA	NA	NA	0.601388	No	No	No	Yes
OR52N4	NA	NA	0.226282	NA	No	No	Yes	No
OR56B1	NA	NA	0.270222	NA	No	No	Yes	No
OR5E1P	NA	NA	0.187185	NA	No	No	Yes	No
OSBPL5	NA	NA	0.549214	NA	No	No	Yes	No
OTUD4	NA	NA	NA	0.516041	No	No	No	Yes
OTUD5	NA	NA	0.317256	NA	No	No	Yes	No
OTUD7B	NA	NA	0.182939	NA	No	No	Yes	No
P2RX4	NA	NA	NA	0.333681	No	No	No	Yes
P2RX7	NA	NA	0.349245	NA	No	No	Yes	No
P2RY12	NA	NA	0.349371	NA	No	No	Yes	No
P2RY14	NA	NA	0.525743	0.626955	No	No	Yes	Yes
P2RY6	NA	NA	0.503448	NA	No	No	Yes	No
PACRGL	NA	NA	NA	0.221405	No	No	No	Yes
PADI6	NA	NA	0.240433	NA	No	No	Yes	No
PAN2	NA	NA	NA	0.211379	No	No	No	Yes
PANK2	NA	NA	NA	0.698755	No	No	No	Yes
PAPD5	NA	NA	0.43957	NA	No	No	Yes	No
PAPD7	NA	NA	0.492326	NA	No	No	Yes	No
PAPOLG	NA	NA	NA	0.363025	No	No	No	Yes
PARP10	0.588401	NA	0.713436	0.80864	Yes	No	Yes	Yes
PARP11	NA	NA	0.757228	0.856013	No	No	Yes	Yes
PARP3	0.43535	NA	0.684926	0.632109	Yes	No	Yes	Yes
PATL1	NA	NA	0.706876	0.690352	No	No	Yes	Yes
PCED1B	NA	NA	NA	0.458382	No	No	No	Yes
PCF11	NA	NA	NA	0.332071	No	No	No	Yes
PCGF5	NA	NA	0.583907	0.886059	No	No	Yes	Yes
PCK2	NA	NA	NA	0.758621	No	No	No	Yes
PDCD1LG2	0.572348	NA	0.789542	0.732799	Yes	No	Yes	Yes
PDE4B	NA	NA	NA	0.567018	No	No	No	Yes
PDE9A	NA	NA	0.251575	0.312556	No	No	Yes	Yes
PDGFRB	NA	NA	0.219311	NA	No	No	Yes	No
PDHX	NA	NA	0.463339	0.270971	No	No	Yes	Yes
PDIA3	NA	NA	NA	0.545222	No	No	No	Yes
PDIA3P1	NA	NA	NA	0.556461	No	No	No	Yes
PDLIM5	NA	NA	0.40734	NA	No	No	Yes	No
PER3	NA	NA	NA	0.29573	No	No	No	Yes
PEX26	NA	NA	NA	0.344605	No	No	No	Yes
PGAP1	0.702028	NA	0.694733	NA	Yes	No	Yes	No
PHACTR2	NA	NA	0.599321	NA	No	No	Yes	No
PHF1	NA	NA	0.364498	NA	No	No	Yes	No
PHF11	0.600503	NA	0.654039	0.841338	Yes	No	Yes	Yes
PIM1	NA	NA	NA	0.336885	No	No	No	Yes
PIM2	NA	NA	NA	0.472976	No	No	No	Yes
PIP5K1A	NA	NA	0.197367	NA	No	No	Yes	No
PIWIL4	NA	NA	0.406389	NA	No	No	Yes	No
PLA2G7	NA	NA	0.236348	NA	No	No	Yes	No
PLAGL1	NA	NA	NA	0.339524	No	No	No	Yes
PLAUR	NA	NA	NA	0.629173	No	No	No	Yes
PLEKHH1	NA	NA	0.317477	NA	No	No	Yes	No
PLEKHO1	NA	NA	0.587496	NA	No	No	Yes	No
PLEKHO2	NA	NA	NA	0.376903	No	No	No	Yes
PLSCR1	0.772487	0.871859	0.561926	NA	Yes	Yes	Yes	No
PLSCR4	NA	NA	0.453882	0.412931	No	No	Yes	Yes
PLVAP	NA	NA	NA	0.320822	No	No	No	Yes
PML	0.639247	NA	0.89487	0.905307	Yes	No	Yes	Yes
PMS2L2	NA	NA	NA	0.136902	No	No	No	Yes
PMS2P4	NA	NA	NA	0.293253	No	No	No	Yes
PNPT1	0.542593	NA	0.661646	0.680489	Yes	No	Yes	Yes
PNRC2	NA	NA	NA	0.409673	No	No	No	Yes
POLB	NA	NA	0.572563	0.758435	No	No	Yes	Yes
POLR3GL	NA	NA	NA	0.544737	No	No	No	Yes
PPA1	NA	NA	NA	0.377569	No	No	No	Yes
PPARGC1B	NA	NA	0.397119	NA	No	No	Yes	No
PPEF1	NA	NA	0.312941	0.203454	No	No	Yes	Yes
PPM1J	NA	NA	NA	0.272914	No	No	No	Yes
PPM1K	NA	NA	0.577199	0.403224	No	No	Yes	Yes
PPP1R16B	NA	NA	0.287692	NA	No	No	Yes	No
PPP2R5B	NA	NA	0.315592	NA	No	No	Yes	No
PPP2R5E	NA	NA	0.178548	NA	No	No	Yes	No
PRDM1	NA	NA	NA	0.566181	No	No	No	Yes
PRDM8	NA	NA	NA	0.371569	No	No	No	Yes
PRKAG2	NA	NA	0.267965	0.588072	No	No	Yes	Yes
PRKCE	NA	NA	0.407702	0.510473	No	No	Yes	Yes
PRKD2	NA	NA	NA	0.699393	No	No	No	Yes
PRKX	NA	NA	NA	0.624145	No	No	No	Yes
PRLR	NA	NA	0.447543	NA	No	No	Yes	No
PRORSD1P	NA	NA	0.179295	0.398222	No	No	Yes	Yes
PRPF40A	NA	NA	NA	0.651311	No	No	No	Yes
PRPS2	NA	NA	NA	0.471453	No	No	No	Yes
PRR11	NA	NA	NA	0.651662	No	No	No	Yes
PRR5L	NA	NA	0.381527	NA	No	No	Yes	No
PRRG4	NA	NA	NA	0.603016	No	No	No	Yes
PRTG	NA	NA	0.172601	NA	No	No	Yes	No
PSD3	0.343422	NA	NA	NA	Yes	No	No	No
PSEN2	NA	NA	0.461763	NA	No	No	Yes	No
PSG3	NA	NA	0.161414	NA	No	No	Yes	No
PSKH2	NA	NA	NA	0.207218	No	No	No	Yes
PSMA3	NA	NA	0.630394	0.693735	No	No	Yes	Yes
PSMA4	NA	NA	0.680424	0.723926	No	No	Yes	Yes
PSMA5	NA	0.539186	NA	0.710121	No	Yes	No	Yes
PSMB10	NA	NA	0.604	0.664593	No	No	Yes	Yes
PSMB2	NA	NA	NA	0.596494	No	No	No	Yes
PSMB9	0.56719	NA	0.778994	0.829379	Yes	No	Yes	Yes
PSMC2	NA	NA	0.52927	NA	No	No	Yes	No
PSME1	NA	NA	0.695812	0.757155	No	No	Yes	Yes
PSME2	0.59111	NA	0.784146	0.847345	Yes	No	Yes	Yes
PSTPIP2	NA	NA	0.659571	NA	No	No	Yes	No
PTGES3	NA	NA	NA	0.689525	No	No	No	Yes
PTK6	NA	NA	0.242939	NA	No	No	Yes	No
PTP4A1	NA	NA	NA	0.480802	No	No	No	Yes
PTPN6	NA	NA	0.290232	0.279941	No	No	Yes	Yes
PTTG1	NA	NA	0.27841	NA	No	No	Yes	No
PXDC1	NA	NA	0.367857	NA	No	No	Yes	No
QSER1	NA	NA	NA	0.293784	No	No	No	Yes
RAB11FIP4	NA	NA	0.467943	NA	No	No	Yes	No
RAB20	NA	NA	0.461513	NA	No	No	Yes	No
RAB24	NA	NA	NA	0.413997	No	No	No	Yes
RAB38	NA	NA	0.211915	NA	No	No	Yes	No
RAB39A	NA	NA	0.580907	0.355198	No	No	Yes	Yes
RAB43	NA	NA	0.304509	NA	No	No	Yes	No
RAB8A	NA	NA	0.616377	0.693961	No	No	Yes	Yes
RABGGTA	NA	NA	0.449704	NA	No	No	Yes	No
RAD51AP1	NA	NA	0.386489	NA	No	No	Yes	No
RALGDS	NA	NA	0.299766	NA	No	No	Yes	No
RANGAP1	NA	NA	NA	0.548696	No	No	No	Yes
RARRES3	NA	NA	0.719143	0.824626	No	No	Yes	Yes
RASGEF1B	NA	NA	0.51954	0.295607	No	No	Yes	Yes
RASGRP3	0.611751	NA	0.730303	0.60802	Yes	No	Yes	Yes
RASSF5	NA	NA	0.369056	NA	No	No	Yes	No
RBBP6	NA	NA	NA	0.505409	No	No	No	Yes
RBBP8	NA	NA	0.424009	NA	No	No	Yes	No
RBCK1	NA	NA	0.662415	0.80638	No	No	Yes	Yes
RBM43	NA	NA	0.481283	0.819759	No	No	Yes	Yes
RBMS3	0.412695	NA	NA	NA	Yes	No	No	No
RDH14	NA	NA	0.547096	NA	No	No	Yes	No
REC8	0.527533	0.628032	NA	0.619865	Yes	Yes	No	Yes
REEP3	NA	NA	NA	0.531327	No	No	No	Yes
REL	NA	NA	NA	0.556762	No	No	No	Yes
RELB	NA	NA	NA	0.426281	No	No	No	Yes
RELL2	NA	NA	0.452525	NA	No	No	Yes	No
RERE	NA	NA	0.427322	NA	No	No	Yes	No
RFX5	NA	NA	NA	0.815512	No	No	No	Yes
RGAG4	NA	NA	0.292691	NA	No	No	Yes	No
RGL1	NA	NA	0.462578	NA	No	No	Yes	No
RGS10	NA	NA	0.421291	NA	No	No	Yes	No
RHBDF2	NA	NA	0.469869	0.774807	No	No	Yes	Yes
RHEBL1	NA	NA	0.383685	NA	No	No	Yes	No
RHOC	NA	NA	NA	0.633997	No	No	No	Yes
RICTOR	NA	NA	0.464614	NA	No	No	Yes	No
RILP	NA	NA	NA	0.484921	No	No	No	Yes
RILPL2	NA	NA	NA	0.47946	No	No	No	Yes
RIN2	NA	NA	0.147349	0.497516	No	No	Yes	Yes
RIPK1	NA	NA	NA	0.674656	No	No	No	Yes
RIPK2	NA	NA	NA	0.818317	No	No	No	Yes
RMI1	NA	NA	NA	0.527437	No	No	No	Yes
RNASEH2B	NA	NA	NA	0.472704	No	No	No	Yes
RNASEH2C	NA	NA	NA	0.282311	No	No	No	Yes
RNF114	NA	NA	NA	0.65567	No	No	No	Yes
RNF115	NA	NA	NA	0.711115	No	No	No	Yes
RNF122	NA	NA	0.31409	NA	No	No	Yes	No
RNF13	NA	NA	NA	0.329723	No	No	No	Yes
RNF138	NA	NA	0.480634	NA	No	No	Yes	No
RNF144A	NA	NA	0.399034	0.635006	No	No	Yes	Yes
RNF169	NA	NA	NA	0.318897	No	No	No	Yes
RNF181	NA	NA	NA	0.388991	No	No	No	Yes
RNF185	NA	NA	NA	0.522221	No	No	No	Yes
RNF19B	NA	NA	NA	0.549188	No	No	No	Yes
RNF207	NA	NA	0.172606	NA	No	No	Yes	No
RNF213	NA	NA	0.74949	0.791034	No	No	Yes	Yes
RNF31	0.656414	NA	0.613771	0.782559	Yes	No	Yes	Yes
RPL28	NA	NA	NA	0.640677	No	No	No	Yes
RPS19	NA	NA	NA	0.239155	No	No	No	Yes
RRAS	NA	NA	NA	0.259106	No	No	No	Yes
RSG1	NA	NA	NA	0.23728	No	No	No	Yes
RSPH9	NA	NA	NA	0.488713	No	No	No	Yes
RTCB	NA	NA	0.653335	NA	No	No	Yes	No
RUNX3	NA	NA	0.337271	NA	No	No	Yes	No
S1PR2	NA	NA	0.545647	NA	No	No	Yes	No
SAMHD1	NA	NA	NA	0.851293	No	No	No	Yes
SARAF	NA	NA	0.396191	NA	No	No	Yes	No
SASH3	NA	NA	NA	0.563309	No	No	No	Yes
SAT1	NA	NA	NA	0.444146	No	No	No	Yes
SAT2	NA	NA	NA	0.464256	No	No	No	Yes
SCAF11	NA	NA	NA	0.551841	No	No	No	Yes
SCAMP5	NA	NA	0.28098	NA	No	No	Yes	No
SCARB2	NA	NA	0.711584	0.791131	No	No	Yes	Yes
SCARF1	NA	NA	0.337763	0.579979	No	No	Yes	Yes
SCIN	NA	NA	0.228499	NA	No	No	Yes	No
SCLT1	NA	NA	0.326906	NA	No	No	Yes	No
SCOC-AS1	NA	NA	0.169776	NA	No	No	Yes	No
SCRN3	NA	NA	NA	0.669156	No	No	No	Yes
SCUBE2	NA	NA	0.446724	NA	No	No	Yes	No
SCYL3	NA	NA	NA	0.64272	No	No	No	Yes
SDC3	NA	NA	0.537086	NA	No	No	Yes	No
SDSL	NA	NA	0.457139	NA	No	No	Yes	No
SEC24D	NA	NA	NA	0.610566	No	No	No	Yes
SECTM1	NA	NA	0.709641	0.585819	No	No	Yes	Yes
SELL	NA	NA	NA	0.211921	No	No	No	Yes
SELP	NA	NA	NA	0.450888	No	No	No	Yes
SEMA4D	NA	NA	0.611273	NA	No	No	Yes	No
2004-09-01	NA	NA	0.618796	0.775158	No	No	Yes	Yes
2006-09-01	NA	NA	0.469712	0.68833	No	No	Yes	Yes
2008-09-01	NA	NA	0.254695	NA	No	No	Yes	No
SERPINB6	NA	NA	NA	0.331521	No	No	No	Yes
SERPINB9	NA	NA	0.381632	0.528862	No	No	Yes	Yes
SERPINB9P1	NA	NA	NA	0.522635	No	No	No	Yes
SERPING1	NA	0.533322	0.940631	0.862222	No	Yes	Yes	Yes
SERPINI1	NA	NA	0.288341	NA	No	No	Yes	No
SERTAD3	NA	NA	0.265449	NA	No	No	Yes	No
SESTD1	NA	NA	NA	0.73451	No	No	No	Yes
SETD2	NA	NA	NA	0.37639	No	No	No	Yes
SETDB1	NA	NA	NA	0.401468	No	No	No	Yes
SETDB2	NA	NA	NA	0.526635	No	No	No	Yes
SFMBT1	NA	NA	0.244384	NA	No	No	Yes	No
SFN	NA	NA	NA	0.238853	No	No	No	Yes
SGOL2	NA	NA	NA	0.2427	No	No	No	Yes
SHISA5	NA	NA	0.607402	0.754263	No	No	Yes	Yes
SIGLEC11	NA	NA	0.230157	NA	No	No	Yes	No
SIGLEC14	NA	NA	0.163953	NA	No	No	Yes	No
SIK1	NA	NA	0.418691	NA	No	No	Yes	No
SIPA1L1	NA	NA	0.344222	0.513601	No	No	Yes	Yes
SKA2	NA	NA	NA	0.403565	No	No	No	Yes
SKIL	NA	NA	0.364321	NA	No	No	Yes	No
SLA2	NA	NA	NA	0.253615	No	No	No	Yes
SLAMF7	NA	NA	0.727642	NA	No	No	Yes	No
SLAMF8	NA	NA	0.475816	0.272226	No	No	Yes	Yes
SLC11A2	NA	NA	NA	0.336954	No	No	No	Yes
SLC12A7	NA	NA	0.267405	NA	No	No	Yes	No
SLC12A8	NA	NA	0.533447	NA	No	No	Yes	No
SLC16A3	NA	NA	NA	0.213541	No	No	No	Yes
SLC20A1	NA	NA	NA	0.567377	No	No	No	Yes
SLC22A5	NA	NA	NA	0.549885	No	No	No	Yes
SLC25A22	NA	NA	0.530715	0.57339	No	No	Yes	Yes
SLC25A25	NA	NA	0.41951	NA	No	No	Yes	No
SLC25A28	NA	NA	0.558007	0.473909	No	No	Yes	Yes
SLC25A30	NA	NA	NA	0.60432	No	No	No	Yes
SLC27A2	NA	NA	0.191045	NA	No	No	Yes	No
SLC27A3	NA	NA	0.46605	0.812093	No	No	Yes	Yes
SLC2A12	NA	NA	0.402547	NA	No	No	Yes	No
SLC2A13	NA	NA	0.335199	0.393508	No	No	Yes	Yes
SLC30A4	NA	NA	0.313053	NA	No	No	Yes	No
SLC35A4	NA	NA	NA	0.443247	No	No	No	Yes
SLC37A1	NA	NA	0.74426	0.758894	No	No	Yes	Yes
SLC38A5	NA	NA	0.587885	NA	No	No	Yes	No
SLC38A7	NA	NA	0.464925	NA	No	No	Yes	No
SLC39A11	NA	NA	0.200312	0.364403	No	No	Yes	Yes
SLC3A2	NA	NA	NA	0.274181	No	No	No	Yes
SLC43A3	NA	NA	NA	0.696792	No	No	No	Yes
SLC47A1	NA	NA	0.310732	NA	No	No	Yes	No
SLC4A2	NA	NA	NA	0.299438	No	No	No	Yes
SLC4A5	NA	NA	NA	0.345195	No	No	No	Yes
SLC6A12	NA	NA	0.66999	0.412817	No	No	Yes	Yes
SLFN11	NA	NA	NA	0.493203	No	No	No	Yes
SLFN12	NA	NA	NA	0.507714	No	No	No	Yes
SLFN13	NA	NA	NA	0.433256	No	No	No	Yes
SLFN5	NA	NA	0.488567	0.70282	No	No	Yes	Yes
SLIT2	NA	NA	0.298247	NA	No	No	Yes	No
SLK	NA	NA	NA	0.425764	No	No	No	Yes
SLU7	NA	NA	NA	0.569653	No	No	No	Yes
SMAD3	NA	NA	0.463544	0.465609	No	No	Yes	Yes
SMAD7	NA	NA	0.265599	NA	No	No	Yes	No
SMCHD1	NA	NA	0.522084	NA	No	No	Yes	No
SMCO4	NA	NA	NA	0.482193	No	No	No	Yes
SMCR8	NA	NA	0.407299	NA	No	No	Yes	No
SMIM20	NA	NA	NA	0.587834	No	No	No	Yes
SMPD3	NA	NA	0.507627	NA	No	No	Yes	No
SNN	NA	NA	0.40013	NA	No	No	Yes	No
SNTB1	NA	NA	NA	0.738018	No	No	No	Yes
SNTB2	NA	NA	0.426374	NA	No	No	Yes	No
SNX19	NA	NA	0.299654	NA	No	No	Yes	No
SNX20	NA	NA	0.33641	0.62653	No	No	Yes	Yes
SNX7	NA	NA	0.130562	NA	No	No	Yes	No
SOCS1	NA	NA	0.378237	0.821815	No	No	Yes	Yes
SP140	NA	NA	0.808194	0.909034	No	No	Yes	Yes
SP140L	NA	NA	0.511241	0.843953	No	No	Yes	Yes
SPATA13	NA	NA	0.529618	NA	No	No	Yes	No
SPATA32	NA	NA	NA	0.205009	No	No	No	Yes
SPG11	NA	NA	NA	0.579239	No	No	No	Yes
SPHK1	NA	NA	0.311228	NA	No	No	Yes	No
SPIC	NA	NA	0.566798	NA	No	No	Yes	No
SRC	NA	NA	0.564386	0.385654	No	No	Yes	Yes
SREBF1	NA	NA	0.289594	NA	No	No	Yes	No
SSB	NA	NA	0.631195	0.760834	No	No	Yes	Yes
SSFA2	NA	NA	NA	0.391959	No	No	No	Yes
SSPN	NA	NA	NA	0.503923	No	No	No	Yes
SSR1	NA	NA	NA	0.520018	No	No	No	Yes
SSR4P1	NA	NA	0.312816	NA	No	No	Yes	No
SSTR3	0.446404	NA	NA	0.305732	Yes	No	No	Yes
ST3GAL5	NA	NA	0.712222	NA	No	No	Yes	No
ST3GAL6	NA	NA	NA	0.269942	No	No	No	Yes
STAC3	NA	NA	NA	0.42655	No	No	No	Yes
STAM2	NA	NA	NA	0.489166	No	No	No	Yes
STAP1	NA	NA	0.586026	0.524655	No	No	Yes	Yes
STARD3NL	NA	NA	NA	0.283164	No	No	No	Yes
STARD4	NA	NA	0.509257	NA	No	No	Yes	No
STARD8	NA	NA	0.376567	NA	No	No	Yes	No
STAT4	NA	NA	NA	0.318297	No	No	No	Yes
STAT5A	NA	NA	NA	0.383215	No	No	No	Yes
STIM2	NA	NA	NA	0.564825	No	No	No	Yes
STK40	NA	NA	0.344083	NA	No	No	Yes	No
STOML1	NA	NA	NA	0.643668	No	No	No	Yes
STOX1	NA	NA	0.190364	NA	No	No	Yes	No
STPG2	NA	NA	NA	0.191831	No	No	No	Yes
STS	NA	NA	NA	0.36576	No	No	No	Yes
STX11	NA	NA	0.411216	0.441645	No	No	Yes	Yes
STX17	NA	NA	0.602283	0.889057	No	No	Yes	Yes
STYXL1	NA	NA	NA	0.479707	No	No	No	Yes
SUCNR1	NA	NA	0.507278	0.284004	No	No	Yes	Yes
SYF2	NA	NA	NA	0.534522	No	No	No	Yes
SYMPK	NA	NA	0.465911	NA	No	No	Yes	No
SYNPO2	NA	NA	NA	0.291223	No	No	No	Yes
TAB3	NA	NA	0.29467	NA	No	No	Yes	No
TACR3	NA	NA	0.20584	NA	No	No	Yes	No
TAF1B	NA	NA	0.351826	NA	No	No	Yes	No
TANK	NA	NA	NA	0.473634	No	No	No	Yes
TAP1	0.686286	NA	0.898034	0.865186	Yes	No	Yes	Yes
TAPBP	NA	NA	0.616731	0.371809	No	No	Yes	Yes
TAPBPL	NA	NA	0.478475	0.59207	No	No	Yes	Yes
TARBP1	NA	NA	NA	0.299721	No	No	No	Yes
TARS	NA	NA	NA	0.58764	No	No	No	Yes
TBC1D20	NA	NA	NA	0.533568	No	No	No	Yes
TBC1D2B	NA	NA	0.336748	0.419312	No	No	Yes	Yes
TBK1	NA	NA	NA	0.690123	No	No	No	Yes
TBX19	NA	NA	NA	0.225574	No	No	No	Yes
TCEA3	NA	NA	0.41485	NA	No	No	Yes	No
TCEAL8	NA	NA	NA	0.22173	No	No	No	Yes
TCF4	NA	NA	0.394053	NA	No	No	Yes	No
TCN2	NA	NA	NA	0.337512	No	No	No	Yes
TDGF1	NA	NA	0.211146	NA	No	No	Yes	No
TDRD7	0.689359	NA	0.729144	0.870137	Yes	No	Yes	Yes
TDRKH	NA	NA	0.390271	NA	No	No	Yes	No
TEP1	NA	NA	NA	0.5237	No	No	No	Yes
TESK2	NA	NA	NA	0.487131	No	No	No	Yes
TFEC	NA	NA	NA	0.833857	No	No	No	Yes
TFG	NA	NA	NA	0.429984	No	No	No	Yes
TGIF2	NA	NA	NA	0.673282	No	No	No	Yes
TGM2	NA	NA	0.71867	NA	No	No	Yes	No
TICAM1	NA	NA	0.531716	0.454072	No	No	Yes	Yes
TIMELESS	NA	NA	0.465732	NA	No	No	Yes	No
TIMM10	NA	NA	NA	0.774521	No	No	No	Yes
TLDC1	NA	NA	NA	0.26293	No	No	No	Yes
TLE4	NA	NA	NA	0.441615	No	No	No	Yes
TLR3	NA	NA	0.501391	NA	No	No	Yes	No
TLR7	NA	NA	0.543516	NA	No	No	Yes	No
TM9SF1	NA	NA	NA	0.51308	No	No	No	Yes
TM9SF4	NA	NA	0.278728	NA	No	No	Yes	No
TMEM106A	NA	NA	0.444089	NA	No	No	Yes	No
TMEM106C	NA	NA	NA	0.3718	No	No	No	Yes
TMEM123	NA	NA	0.664411	0.713756	No	No	Yes	Yes
TMEM158	NA	NA	NA	0.312274	No	No	No	Yes
TMEM159	NA	NA	NA	0.507673	No	No	No	Yes
TMEM205	NA	NA	NA	0.381156	No	No	No	Yes
TMEM219	NA	NA	0.446315	0.610233	No	No	Yes	Yes
TMEM229B	NA	NA	0.665945	0.636504	No	No	Yes	Yes
TMEM237	NA	NA	0.362185	NA	No	No	Yes	No
TMEM255A	NA	NA	0.648386	0.408526	No	No	Yes	Yes
TMEM51	NA	NA	0.307579	NA	No	No	Yes	No
TMEM62	NA	NA	NA	0.819415	No	No	No	Yes
TMF1	NA	NA	NA	0.438256	No	No	No	Yes
TMOD2	NA	NA	NA	0.509873	No	No	No	Yes
TMSB10	NA	NA	NA	0.79274	No	No	No	Yes
TMX2	NA	NA	0.360557	NA	No	No	Yes	No
TMX3	NA	NA	NA	0.559754	No	No	No	Yes
TNF	NA	NA	NA	0.361881	No	No	No	Yes
TNFAIP3	NA	NA	NA	0.614643	No	No	No	Yes
TNFAIP6	NA	NA	NA	0.562755	No	No	No	Yes
TNFRSF10A	NA	NA	0.178241	NA	No	No	Yes	No
TNFRSF14	NA	NA	0.464047	NA	No	No	Yes	No
TNFSF10	NA	NA	0.650959	0.416328	No	No	Yes	Yes
TNFSF13B	NA	NA	0.383065	0.560208	No	No	Yes	Yes
TNFSF15	NA	NA	0.345012	0.294292	No	No	Yes	Yes
TNFSF18	NA	NA	0.399001	NA	No	No	Yes	No
TNFSF8	NA	NA	NA	0.376637	No	No	No	Yes
TNIK	NA	NA	NA	0.569491	No	No	No	Yes
TNK2-AS1	NA	NA	0.363571	0.118803	No	No	Yes	Yes
TNNT3	NA	NA	NA	0.293013	No	No	No	Yes
TOP1	NA	NA	NA	0.701932	No	No	No	Yes
TOR1B	NA	NA	0.779251	0.788526	No	No	Yes	Yes
TOR3A	NA	NA	NA	0.469903	No	No	No	Yes
TP53TG1	NA	NA	NA	0.212328	No	No	No	Yes
TPMT	NA	NA	0.524347	NA	No	No	Yes	No
TPP1	NA	NA	NA	0.512554	No	No	No	Yes
TRAF2	NA	NA	0.326691	NA	No	No	Yes	No
TRAF3	NA	NA	NA	0.426293	No	No	No	Yes
TRAF3IP2	NA	NA	NA	0.486317	No	No	No	Yes
TRAK2	0.418814	NA	NA	NA	Yes	No	No	No
TRANK1	0.529456	NA	0.666027	0.676647	Yes	No	Yes	Yes
TRIB2	NA	NA	NA	0.524456	No	No	No	Yes
TRIM14	0.531965	NA	0.632949	0.734832	Yes	No	Yes	Yes
TRIM21	0.722027	NA	0.664067	0.835497	Yes	No	Yes	Yes
TRIM22	0.624905	NA	0.79275	0.827126	Yes	No	Yes	Yes
TRIM26	NA	NA	0.663587	0.807565	No	No	Yes	Yes
TRIM38	NA	NA	NA	0.898549	No	No	No	Yes
TRIM44	NA	NA	0.313526	NA	No	No	Yes	No
TRIM5	0.636742	NA	0.778238	0.895815	Yes	No	Yes	Yes
TRIM56	NA	NA	NA	0.718023	No	No	No	Yes
TRIM68	NA	NA	NA	0.533631	No	No	No	Yes
TRIM69	0.553339	NA	0.594599	0.687517	Yes	No	Yes	Yes
TRIP6	NA	NA	0.516426	NA	No	No	Yes	No
TRMT1	NA	NA	NA	0.198505	No	No	No	Yes
TRMT13	NA	NA	NA	0.406765	No	No	No	Yes
TRPV2	NA	NA	0.527855	NA	No	No	Yes	No
TSC22D1	NA	NA	NA	0.210935	No	No	No	Yes
TSPAN6	NA	NA	0.189115	NA	No	No	Yes	No
TSSK6	NA	NA	NA	0.344541	No	No	No	Yes
TTC21A	0.46426	NA	NA	0.61973	Yes	No	No	Yes
TTC25	NA	NA	NA	0.216516	No	No	No	Yes
TTC38	NA	NA	NA	0.366124	No	No	No	Yes
TTC39C	NA	NA	0.203218	NA	No	No	Yes	No
TTC7B	NA	NA	0.471116	NA	No	No	Yes	No
TUFT1	NA	NA	NA	0.420935	No	No	No	Yes
TXLNB	NA	NA	NA	0.493592	No	No	No	Yes
TXNDC11	NA	NA	0.243111	NA	No	No	Yes	No
TXNL4B	NA	NA	NA	0.700938	No	No	No	Yes
TYMP	NA	0.749678	0.779415	0.637385	No	Yes	Yes	Yes
U2AF1	NA	NA	0.145541	NA	No	No	Yes	No
UBE2S	NA	NA	0.584357	0.730501	No	No	Yes	Yes
UBE2Z	NA	NA	0.631696	NA	No	No	Yes	No
UBFD1	NA	NA	NA	0.215119	No	No	No	Yes
UBP1	NA	NA	0.458516	NA	No	No	Yes	No
UBQLN2	NA	NA	0.234608	NA	No	No	Yes	No
UBQLNL	NA	NA	0.140971	0.503231	No	No	Yes	Yes
UBR1	NA	NA	NA	0.71085	No	No	No	Yes
UNC93B1	NA	NA	0.614613	0.701817	No	No	Yes	Yes
UNK	NA	NA	NA	0.53465	No	No	No	Yes
UPF3B	NA	NA	NA	0.498179	No	No	No	Yes
USF1	NA	NA	NA	0.589337	No	No	No	Yes
USP25	NA	NA	0.539459	0.827802	No	No	Yes	Yes
USP27X-AS1	NA	NA	0.173493	NA	No	No	Yes	No
USP30	NA	NA	NA	0.533225	No	No	No	Yes
USP42	NA	NA	0.486235	0.775709	No	No	Yes	Yes
USP49	NA	NA	NA	0.272318	No	No	No	Yes
USP6NL	NA	NA	0.410214	NA	No	No	Yes	No
USPL1	NA	NA	NA	0.743285	No	No	No	Yes
UST	NA	NA	0.341756	NA	No	No	Yes	No
UTP14A	NA	NA	NA	0.25921	No	No	No	Yes
UTRN	NA	NA	NA	0.680756	No	No	No	Yes
UVRAG	NA	NA	0.434277	0.642549	No	No	Yes	Yes
VAMP3	NA	NA	NA	0.358832	No	No	No	Yes
VAMP5	NA	NA	0.618727	0.734979	No	No	Yes	Yes
VAMP8	NA	NA	NA	0.600462	No	No	No	Yes
VCAM1	NA	NA	0.203664	NA	No	No	Yes	No
VCPIP1	NA	NA	0.424516	0.681141	No	No	Yes	Yes
VPS13C	NA	NA	NA	0.514174	No	No	No	Yes
VPS9D1	NA	NA	0.360681	NA	No	No	Yes	No
VRK2	NA	NA	0.820951	0.698713	No	No	Yes	Yes
VSIG10L	NA	NA	0.396525	NA	No	No	Yes	No
WARS	NA	NA	0.708328	0.521956	No	No	Yes	Yes
WBP5	NA	NA	0.177484	NA	No	No	Yes	No
WDFY1	0.663807	NA	0.780309	0.857841	Yes	No	Yes	Yes
WHAMM	NA	NA	NA	0.526649	No	No	No	Yes
XKR8	NA	NA	0.392481	NA	No	No	Yes	No
XKR9	NA	NA	0.224129	NA	No	No	Yes	No
XPO6	NA	NA	0.455795	NA	No	No	Yes	No
XRN1	NA	NA	0.744312	0.81868	No	No	Yes	Yes
YAF2	NA	NA	NA	0.418029	No	No	No	Yes
YEATS2	0.470204	NA	NA	NA	Yes	No	No	No
ZBTB33	NA	NA	NA	0.526853	No	No	No	Yes
ZBTB42	NA	NA	0.188258	NA	No	No	Yes	No
ZBTB7A	NA	NA	0.247353	NA	No	No	Yes	No
ZC3H12A	NA	NA	NA	0.47933	No	No	No	Yes
ZC3H12D	NA	NA	0.373005	NA	No	No	Yes	No
ZC3H7B	NA	NA	0.535868	0.208172	No	No	Yes	Yes
ZC3HAV1	NA	NA	0.652804	NA	No	No	Yes	No
ZC4H2	NA	NA	0.416422	NA	No	No	Yes	No
ZEB2	NA	NA	NA	0.244963	No	No	No	Yes
ZFYVE26	NA	NA	0.449726	0.76413	No	No	Yes	Yes
ZKSCAN3	NA	NA	NA	0.252069	No	No	No	Yes
ZMAT4	NA	NA	0.229108	NA	No	No	Yes	No
ZNF101	NA	NA	0.359574	NA	No	No	Yes	No
ZNF155	NA	NA	NA	0.416218	No	No	No	Yes
ZNF200	NA	NA	NA	0.732875	No	No	No	Yes
ZNF224	NA	NA	NA	0.58781	No	No	No	Yes
ZNF234	NA	NA	NA	0.256939	No	No	No	Yes
ZNF267	NA	NA	NA	0.537855	No	No	No	Yes
ZNF280B	NA	NA	0.172214	NA	No	No	Yes	No
ZNF346	NA	NA	NA	0.570152	No	No	No	Yes
ZNF350	NA	NA	NA	0.675782	No	No	No	Yes
ZNF366	NA	NA	NA	0.20047	No	No	No	Yes
ZNF441	NA	NA	NA	0.355792	No	No	No	Yes
ZNF442	NA	NA	0.284356	NA	No	No	Yes	No
ZNF45	NA	NA	NA	0.414919	No	No	No	Yes
ZNF496	NA	NA	0.601957	0.726601	No	No	Yes	Yes
ZNF502	NA	NA	0.227047	NA	No	No	Yes	No
ZNF672	NA	NA	0.456309	NA	No	No	Yes	No
ZNF684	NA	NA	0.628003	0.674643	No	No	Yes	Yes
ZNF687	NA	NA	0.240091	NA	No	No	Yes	No
ZNF691	NA	NA	NA	0.358674	No	No	No	Yes
ZNF702P	NA	NA	0.279568	0.211936	No	No	Yes	Yes
ZNF720	NA	NA	NA	0.414816	No	No	No	Yes
ZNF732	NA	NA	NA	0.26762	No	No	No	Yes
ZNF766	NA	NA	NA	0.637825	No	No	No	Yes
ZNRF2	NA	NA	0.310005	NA	No	No	Yes	No
ZRSR2	NA	NA	NA	0.395493	No	No	No	Yes
ZSCAN16	NA	NA	NA	0.498586	No	No	No	Yes
ZSCAN29	NA	NA	NA	0.439497	No	No	No	Yes
